# Supplementary material for: Controlling the emission in flexibly-linked (N^C^N)platinum dyads
Source: Royal Society of Chemistry journal article supplement (doi:10.1039/c7dt03695g), 2017-11-27
Supplement: c7dt03695g1.pdf [file c7dt03695g1.pdf]

## Controlling the Emission in Flexibly-Linked (N<sup>^</sup>C<sup>^</sup>N)Platinum Dyads

Eleonora Garoni,<sup>[a,b]</sup> Julien Boixel,<sup>[a]</sup> Vincent Dorcet,<sup>[a]</sup> Thierry Roisnel,<sup>[a]</sup>

Dominique Roberto,<sup>[b]</sup> Denis Jacquemin,<sup>\*,[c,d]</sup> and Véronique Guerschais<sup>\*,[a]</sup>

### Electronic Supporting Information

#### Table of contents :

|                                                   |     |
|---------------------------------------------------|-----|
| Characterization of precursors and complexes..... | S2  |
| X-ray crystal structure determination.....        | S7  |
| Additional Photophysical spectra.....             | S10 |
| Additional theoretical results.....               | S15 |
| References: .....                                 | S18 |

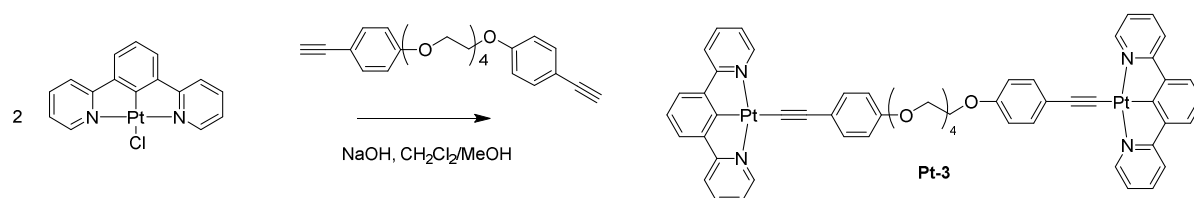

**Scheme S1.** Synthesis of complex **Pt-3**.

#### Numbering

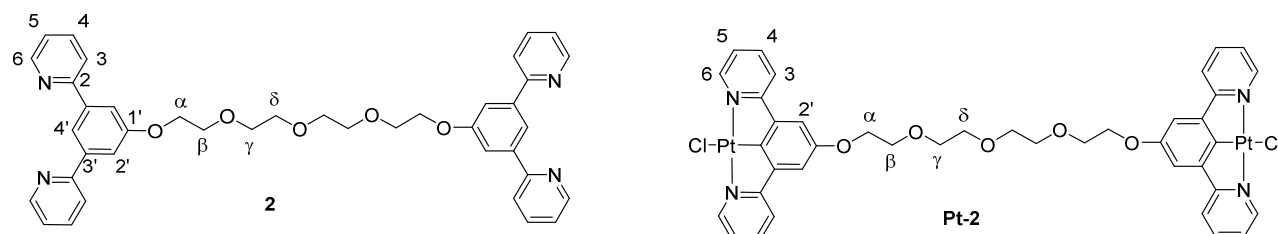

## Characterization of precursors and complexes

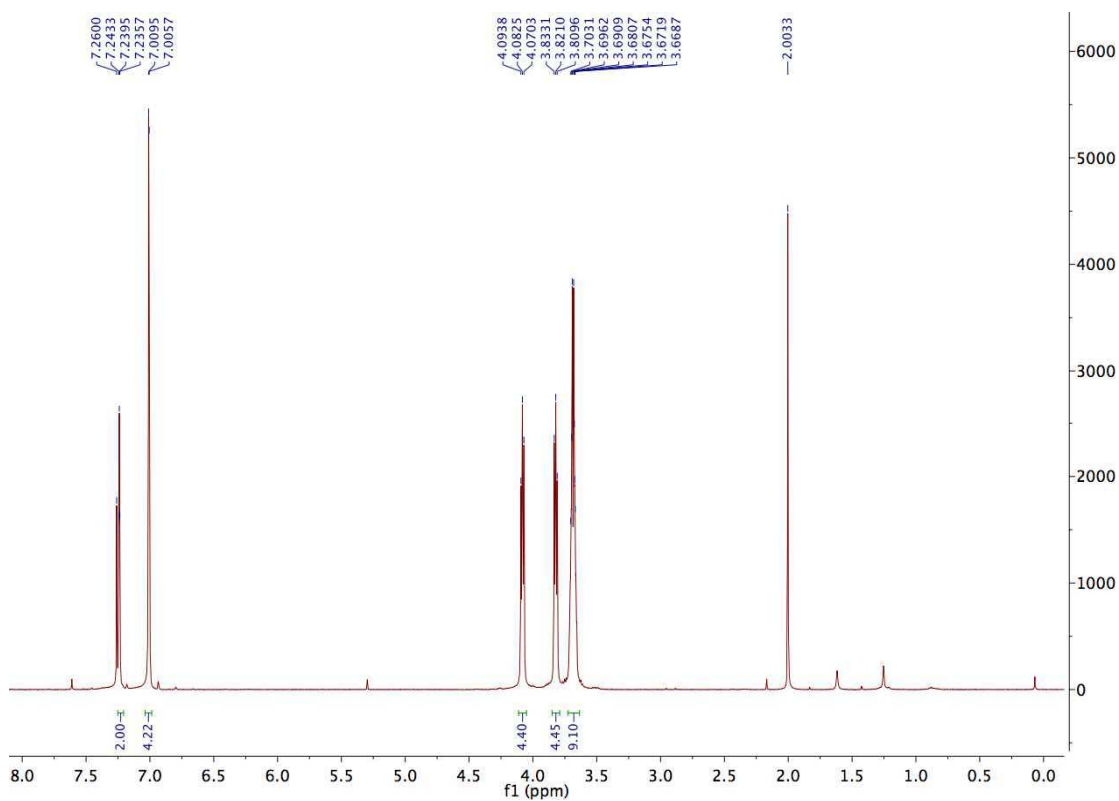

Figure S1. <sup>1</sup>H NMR spectrum of **1** in CDCl<sub>3</sub>.

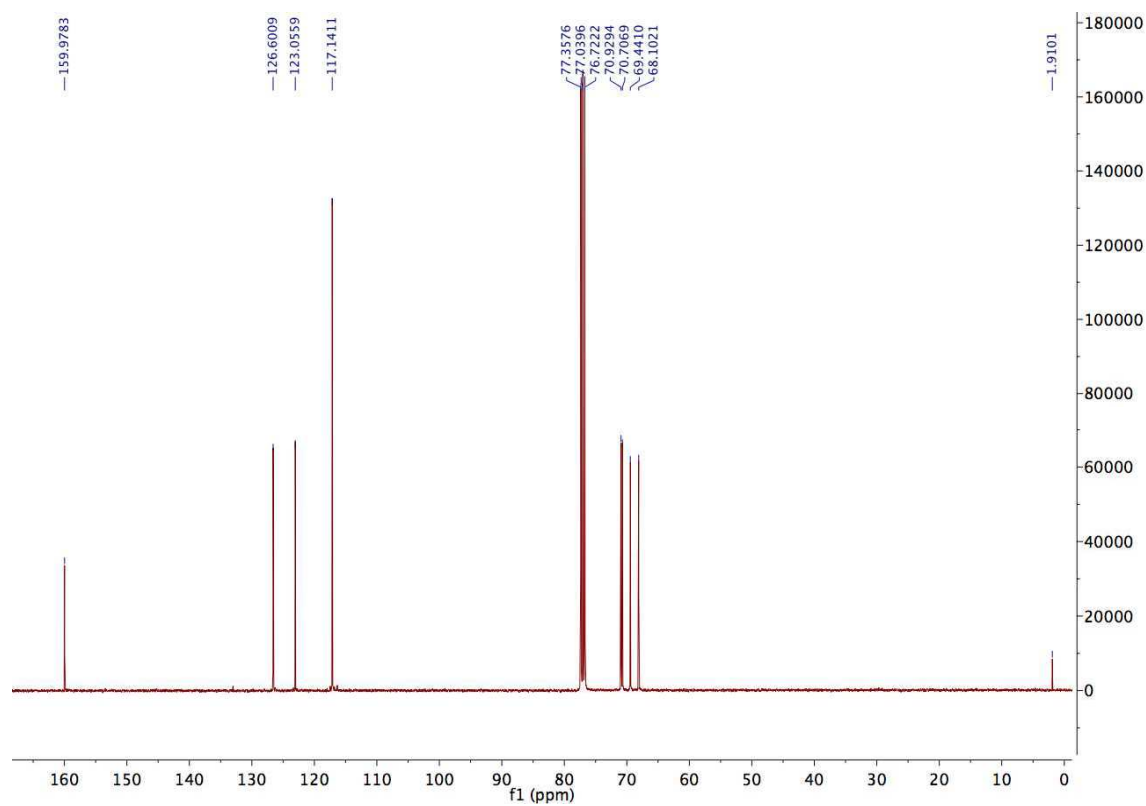

Figure S2. <sup>13</sup>C NMR spectrum of **1** in CDCl<sub>3</sub>.

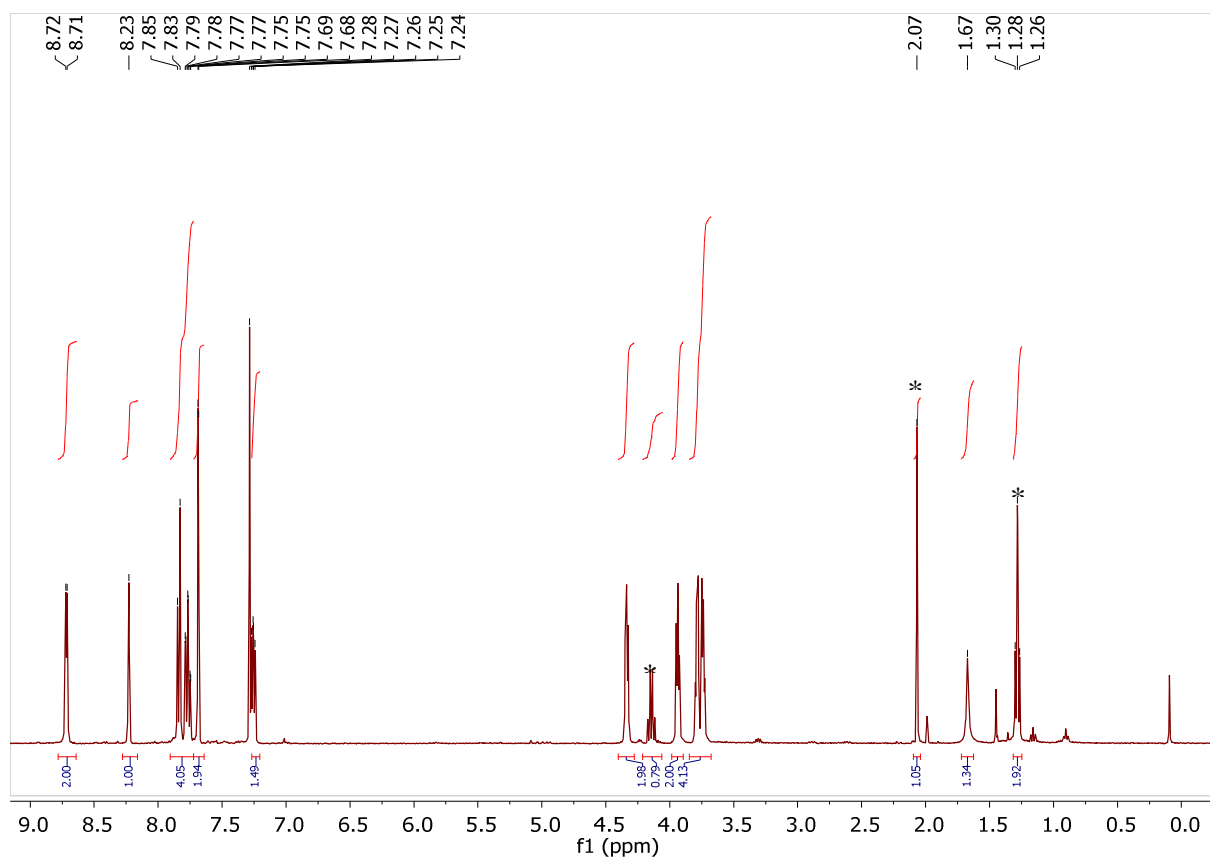

**Figure S3.**  $^1\text{H}$  NMR spectrum of **2** in  $\text{CDCl}_3$ . \*AcOEt.

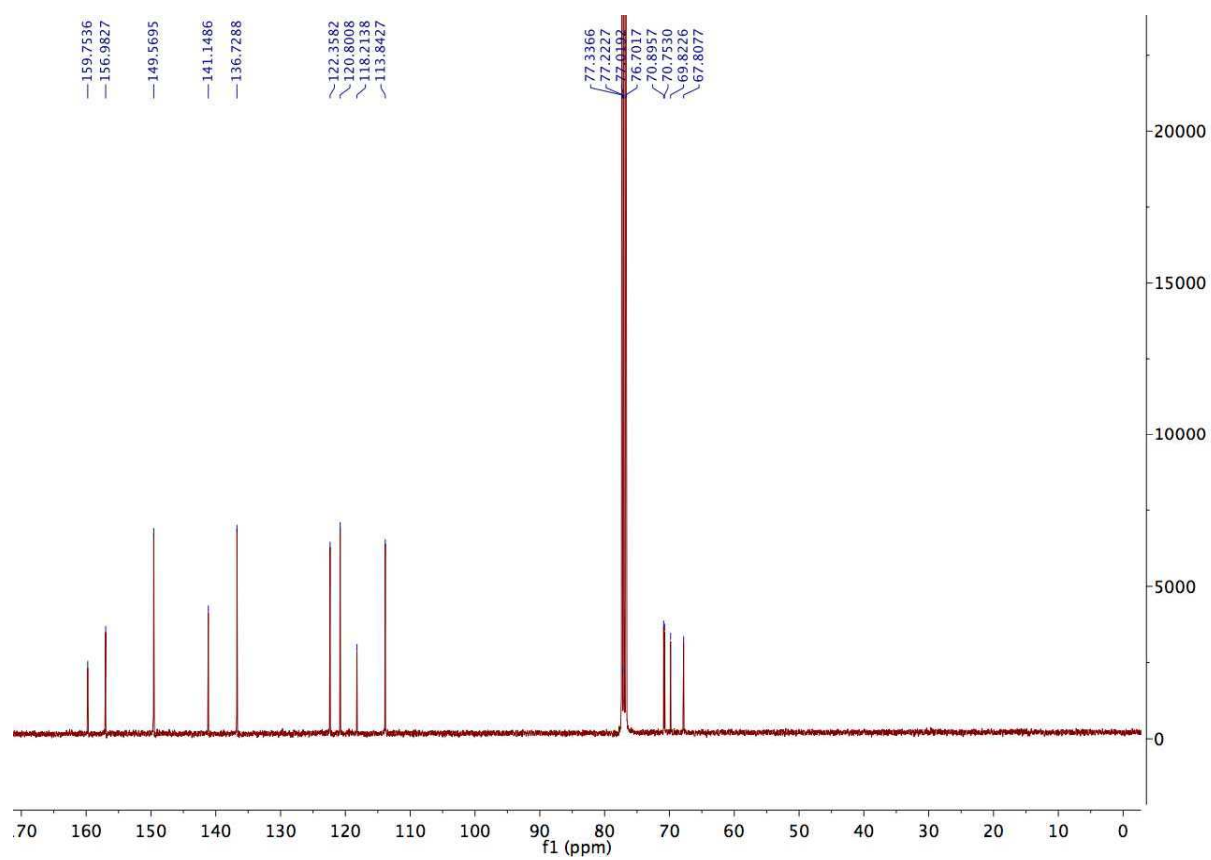

**Figure S4.**  $^{13}\text{C}$  NMR spectrum of **2** in  $\text{CDCl}_3$ .

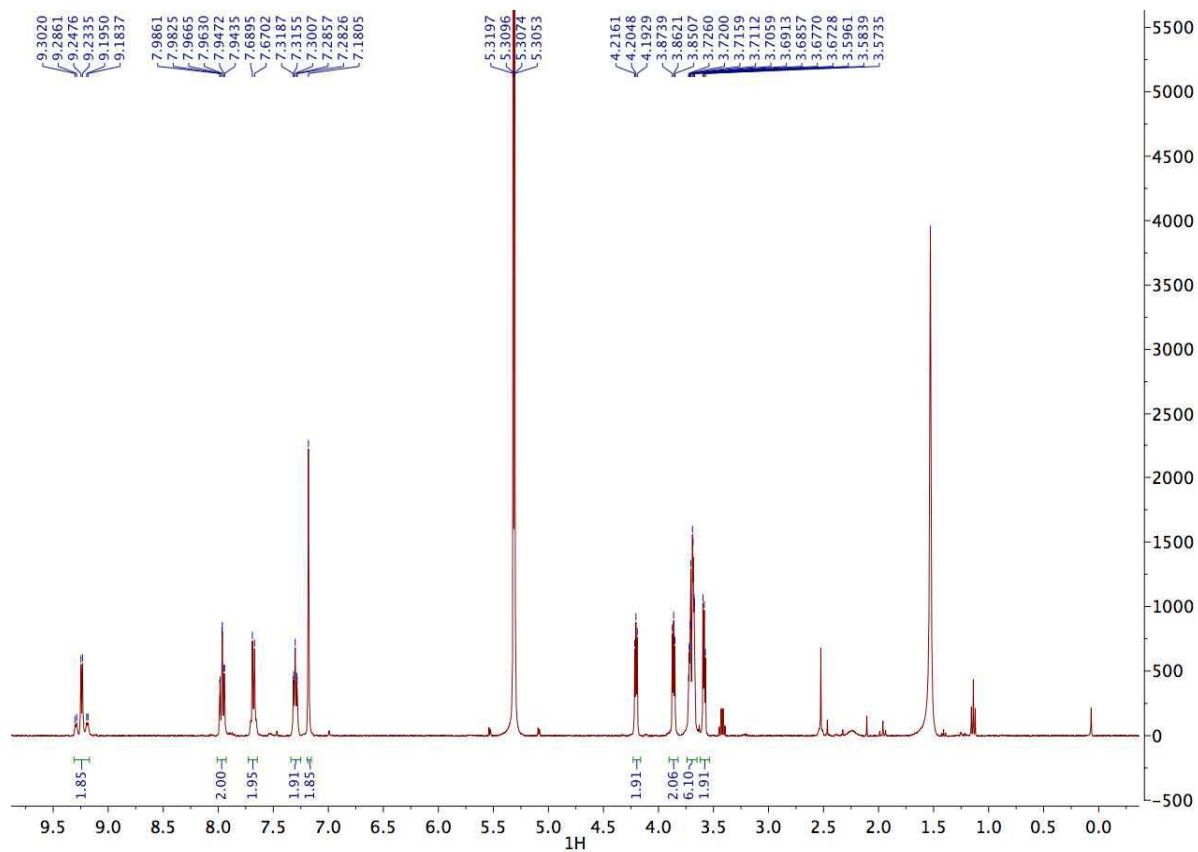

Figure S5.  $^1\text{H}$  NMR spectrum of **Pt-1** in  $\text{CD}_2\text{Cl}_2$ .

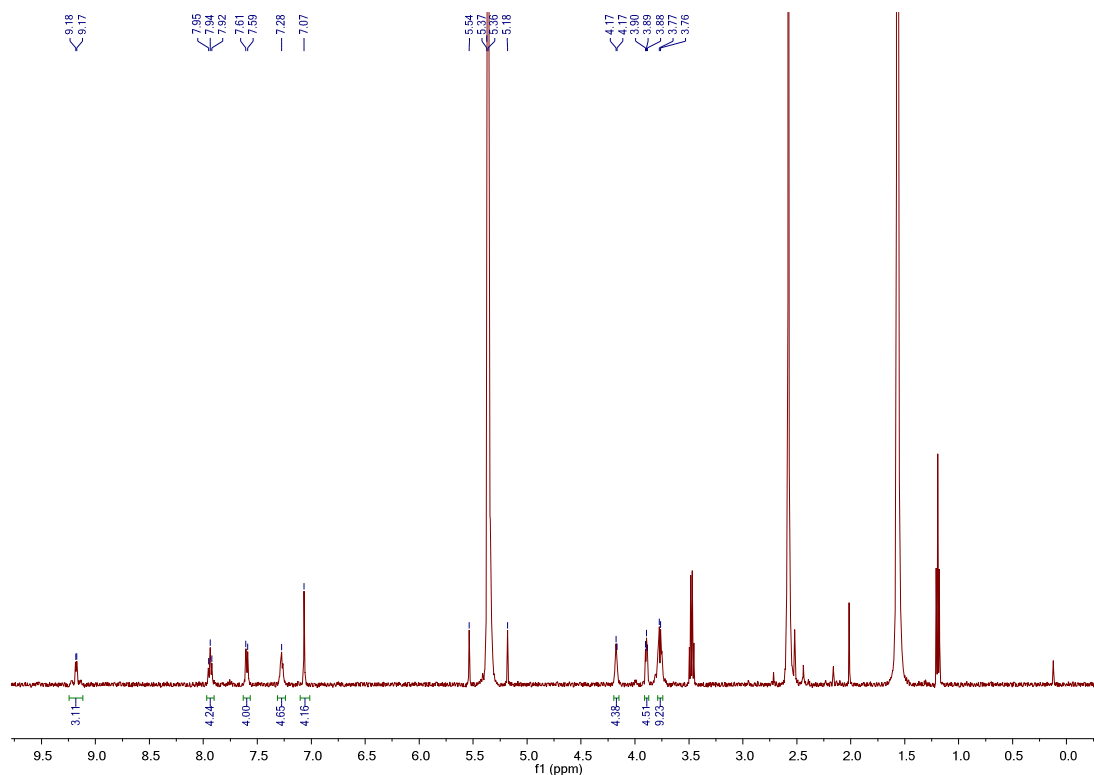

Figure S6.  $^1\text{H}$  NMR spectrum of **Pt-2** in  $\text{CD}_2\text{Cl}_2$ .

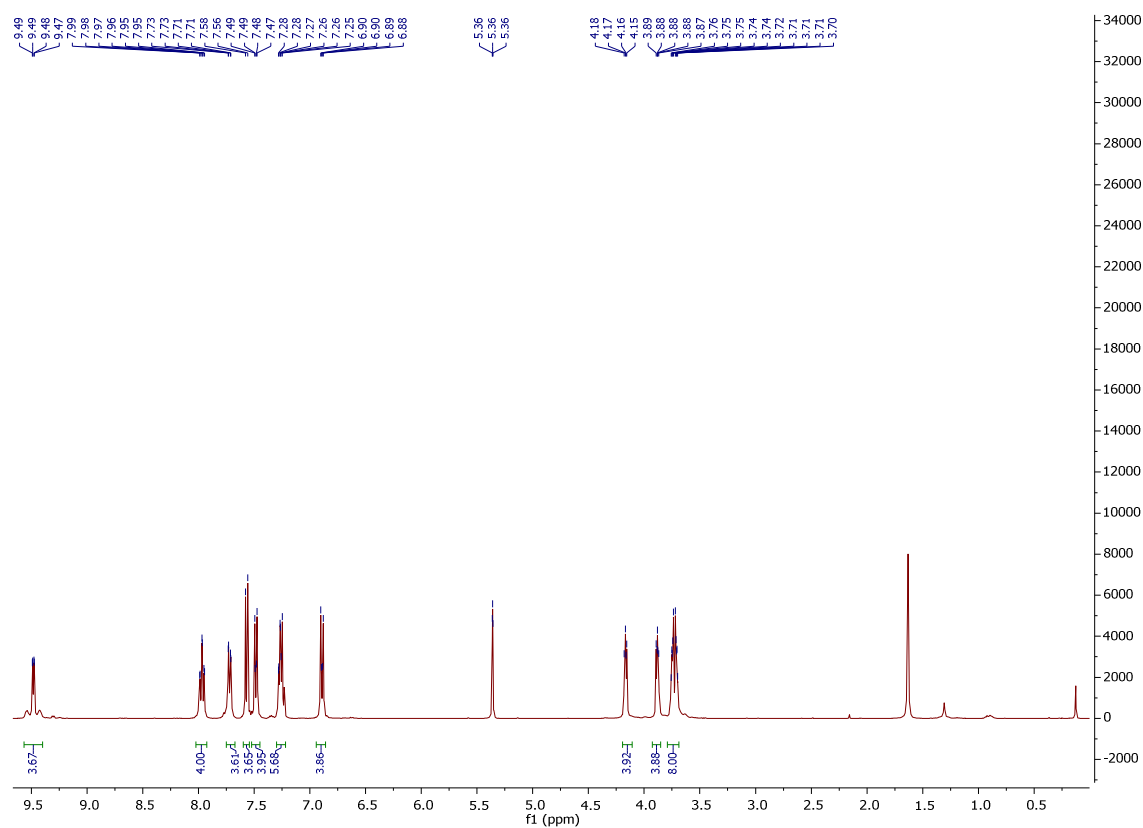

Figure S7.  $^1\text{H}$  NMR spectrum of Pt-3 in  $\text{CD}_2\text{Cl}_2$ .

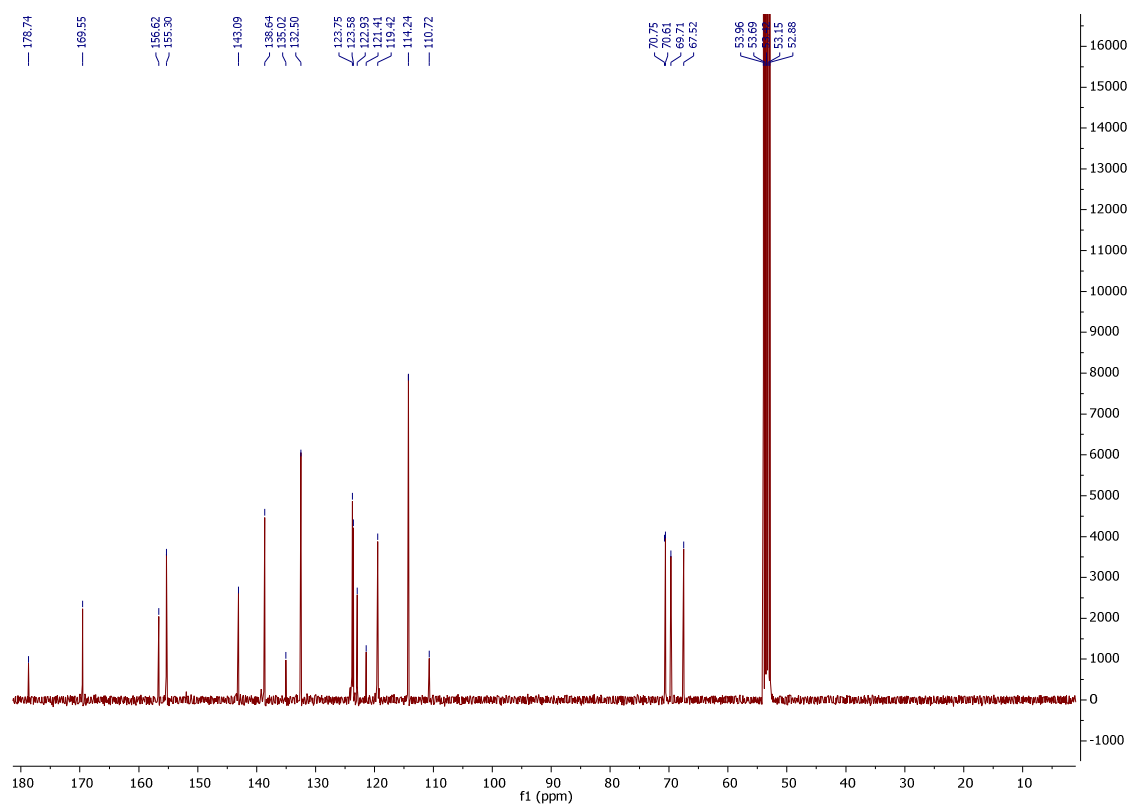

Figure S8.  $^{13}\text{C}$  NMR spectrum of Pt-3 in  $\text{CD}_2\text{Cl}_2$ .

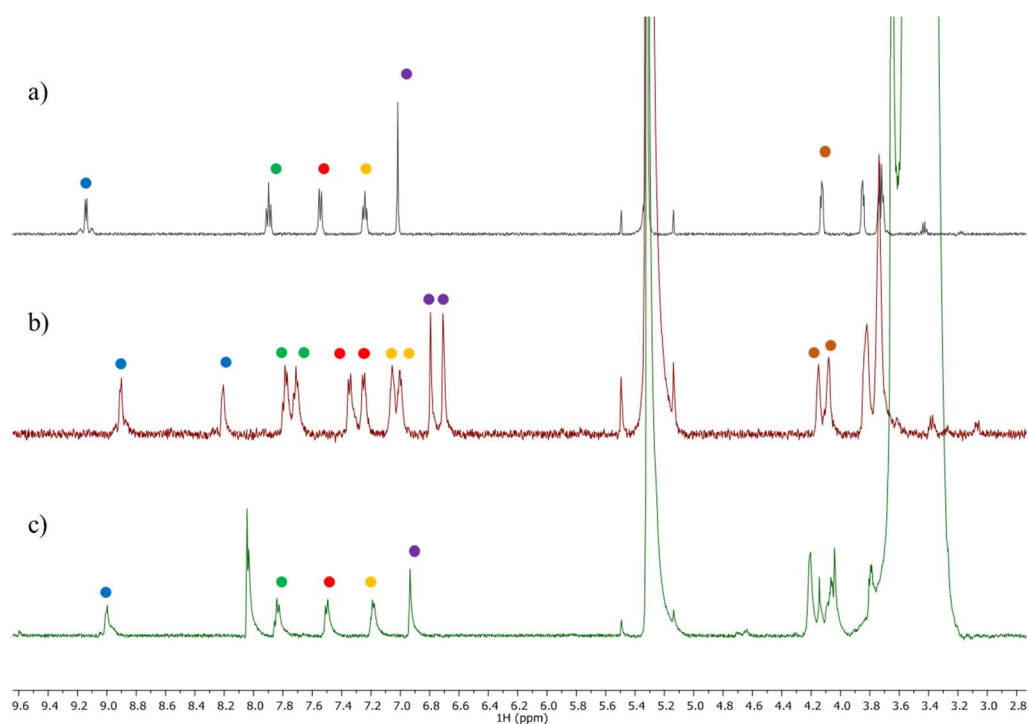

**Figure S9.** <sup>1</sup>H NMR spectra of (a) **Pt-2** in CD<sub>2</sub>Cl<sub>2</sub>, (b) after addition of 10 equiv. of KPF<sub>6</sub> in CD<sub>3</sub>CN, (c) after further addition of 20 equiv. of 18-crown-6 in CD<sub>2</sub>Cl<sub>2</sub>.

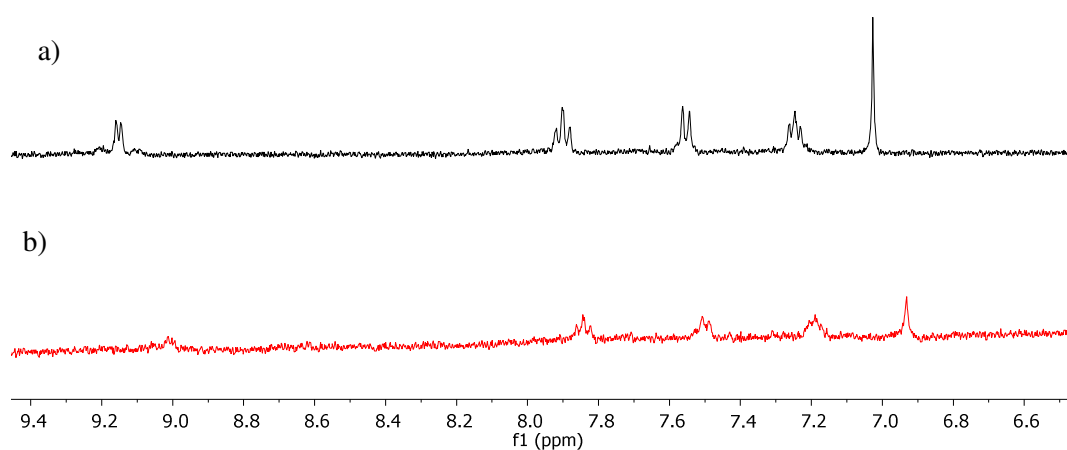

**Figure S10.** <sup>1</sup>H NMR spectra of **Pt-2** in CD<sub>2</sub>Cl<sub>2</sub> (a) before (b) after addition of 10 equiv. of CH<sub>3</sub>CO<sub>2</sub>Cs.

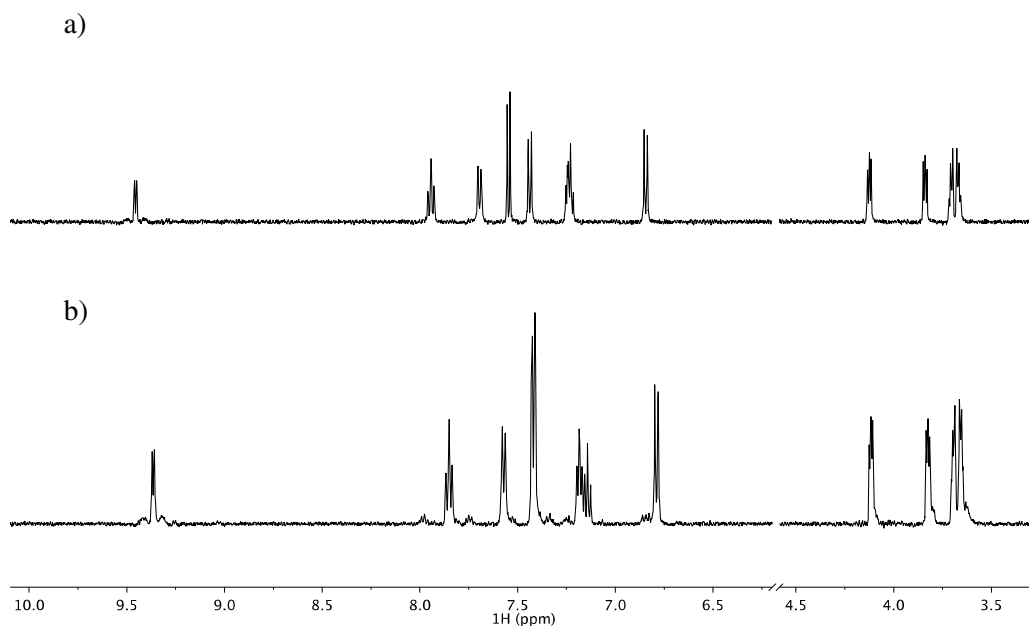

**Figure S11.**  $^1\text{H}$  NMR spectra of (a) **Pt-3** in  $\text{CD}_2\text{Cl}_2$ , (b) after addition of 10 equiv. of  $\text{KPF}_6$  in  $\text{CD}_3\text{CN}$ .

### X-ray crystal structure determination

Orange crystals were grown by slow diffusion of diethyl ether into a concentrated dichloromethane solution of **Pt-1**. A crystal of dimensions 0.45 mm x 0.36 mm x 0.1 mm mounted on a cryoloop was used for data collection. Intensity data were collected at 150 K in a D8 VENTURE Bruker AXS diffractometer. Crystal data for  $\text{C}_{22}\text{H}_{22}\text{ClN}_2\text{O}_4\text{Pt}$  ( $M = 608.95$ ): Mo- $\text{K}\alpha$  radiation ( $\lambda = 0.71073 \text{ \AA}$ ),  $T = 150 \text{ K}$ ; monoclinic  $P 2_1/c$  (I.T.#14),  $a = 14.7007(18)$ ,  $b = 17.547(2)$ ,  $c = 8.3565(9) \text{ \AA}$ ,  $\beta = 105.283(4)^\circ$ ,  $V = 2079.3(4) \text{ \AA}^3$ .  $Z = 4$ ,  $d = 1.945 \text{ g.cm}^{-3}$ ,  $\mu = 6.909 \text{ mm}^{-1}$ . The structure was solved by direct methods using the *SHELXT* program,<sup>1</sup> and then refined with full-matrix least-square methods based on  $F^2$  (*SHELXL-2014*).<sup>2</sup> All non-hydrogen atoms were refined with anisotropic atomic displacement parameters. H atoms were finally included in their calculated positions. A final refinement on  $F^2$  with 4760 unique intensities and 271 parameters converged at  $\omega R(F^2) = 0.1689$  ( $R(F) = 0.0538$ ) for 3997 observed reflections with  $I > 2\sigma(I)$ .

**CCDC: 1556598** contains the supplementary crystallographic data for this paper. These data are provided free of charge by The Cambridge Crystallographic Data Centre. Table **S1** contains a summary of crystallographic data.

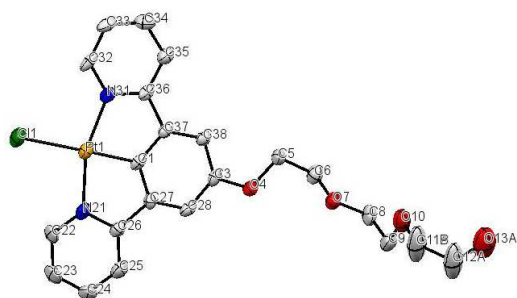

Bond lengths:

Pt1 - C1 = 1.899(8), Pt1 - N31 = 2.041(7), Pt1 - N21 = 2.043(7), Pt1 - Cl1 = 2.417(2), C3 - O4 = 1.357(10)

Bond Angles

C1 - Pt1 - N31 = 81.0(3), C1 - Pt1 - N21 = 80.0(3), N31 - Pt1 - Cl1 = 99.9(2), N21 - Pt1 - Cl1 = 99.2(2), C3 - O4 - C5 = 116.7(7)



Table S1. Crystallographic data for complex **Pt-1**

|                                             |                                                                     |
|---------------------------------------------|---------------------------------------------------------------------|
| Empirical formula                           | C <sub>22</sub> H <sub>22</sub> Cl N <sub>2</sub> O <sub>4</sub> Pt |
| Formula weight                              | 608.95                                                              |
| Temperature                                 | 150 K                                                               |
| Wavelength                                  | 0.71073 Å                                                           |
| Crystal system                              | Monoclinic                                                          |
| Space group                                 | <i>P</i> 21/ <i>c</i>                                               |
| <i>a</i> (Å)                                | 14.7007(18)                                                         |
| <i>b</i> (Å)                                | 17.547(2)                                                           |
| <i>c</i> (Å)                                | 8.3565(9)                                                           |
| $\alpha$ (°)                                | 90                                                                  |
| $\beta$ (°)                                 | 105.283(4)                                                          |
| $\gamma$ (°)                                | 90                                                                  |
| Volume (Å <sup>3</sup> )                    | 2079.3(4)                                                           |
| <i>Z</i>                                    | 4                                                                   |
| $\rho_{\text{calcd}}$ (g cm <sup>-3</sup> ) | 1.945                                                               |
| $\mu$ (mm <sup>-1</sup> )                   | 6.909                                                               |
| F(000)                                      | 1180                                                                |
| Crystal size (mm <sup>3</sup> )             | 0.450 x 0.360 x 0.100                                               |
| Crystal colour                              | orange                                                              |
| $\theta$ range                              | 3.099-27.483                                                        |
| <i>h</i> _min, <i>h</i> _max                | -19, 19                                                             |
| <i>k</i> _min, <i>k</i> _max                | -21, 22                                                             |
| <i>l</i> _min, <i>l</i> _max                | -10, 10                                                             |
| Reflections collected / unique              | 23629 / 4760 [R(int) <sup>a</sup> = 0.0533]                         |
| Reflections [I>2 $\sigma$ ]                 | 3997                                                                |
| Completeness to $\theta_{\text{max}}$       | 0.998                                                               |
| Absorption correction type                  | multi-scan                                                          |
| Max. and min. transmission                  | 0.501-0.261                                                         |
| Refinement method                           | Full-matrix least-squares on <i>F</i> <sup>2</sup>                  |
| Data / restraints / parameters              | 4760 / 0 / 271                                                      |
| <sup>b</sup> Goodness-of-fit                | 1.504                                                               |
| Final <i>R</i> indices [I>2 $\sigma$ ]      | <i>R</i> 1 <sup>c</sup> = 0.0538, <i>wR</i> 2 <sup>d</sup> = 0.1689 |
| <i>R</i> indices (all data)                 | <i>R</i> 1 <sup>c</sup> = 0.0643, <i>wR</i> 2 <sup>d</sup> = 0.1837 |
| Largest diff. peak and hole                 | 2.509, -2.731 e <sup>-</sup> .Å <sup>-3</sup>                       |

### Additional Photophysical spectra.

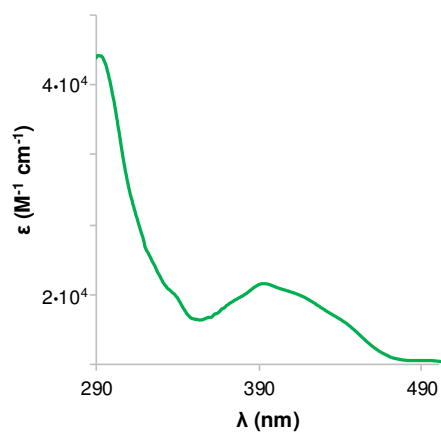

**Figure S12.** UV-vis. absorption spectrum of **Pt-3** in CH<sub>2</sub>Cl<sub>2</sub> solution.

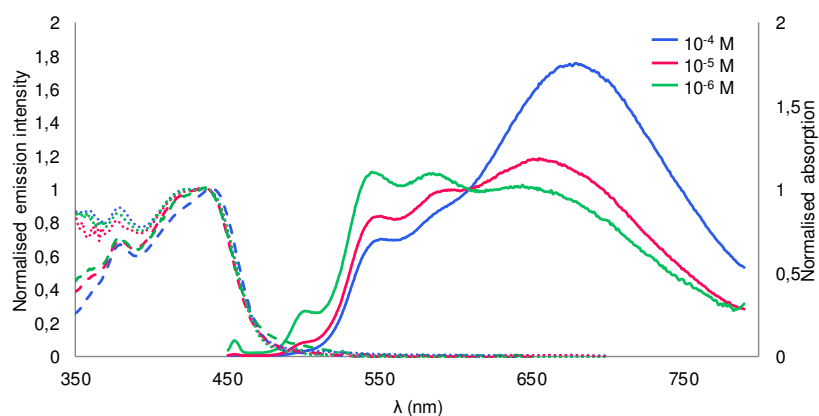

**Figure S13.** Absorption (dotted lines), emission (plain lines) and excitation (dashed lines) spectra of **Pt-2** in CH<sub>2</sub>Cl<sub>2</sub> at different concentrations.

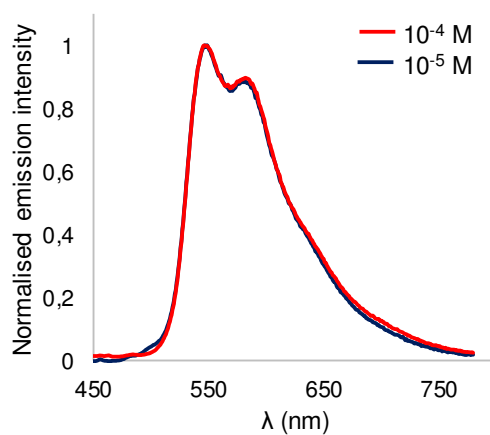

**Figure S14.** Emission spectra ( $\lambda_{\text{exc}} = 400$  nm) of **Pt-1** in CH<sub>2</sub>Cl<sub>2</sub> ( $10^{-4}$  M, red line) and  $10^{-5}$  M (blue line).

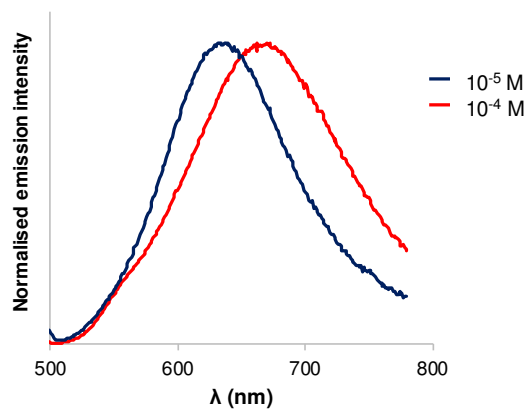

**Figure S15.** Emission spectra of **Pt-2** in  $\text{CH}_3\text{CN}$  at various concentrations.

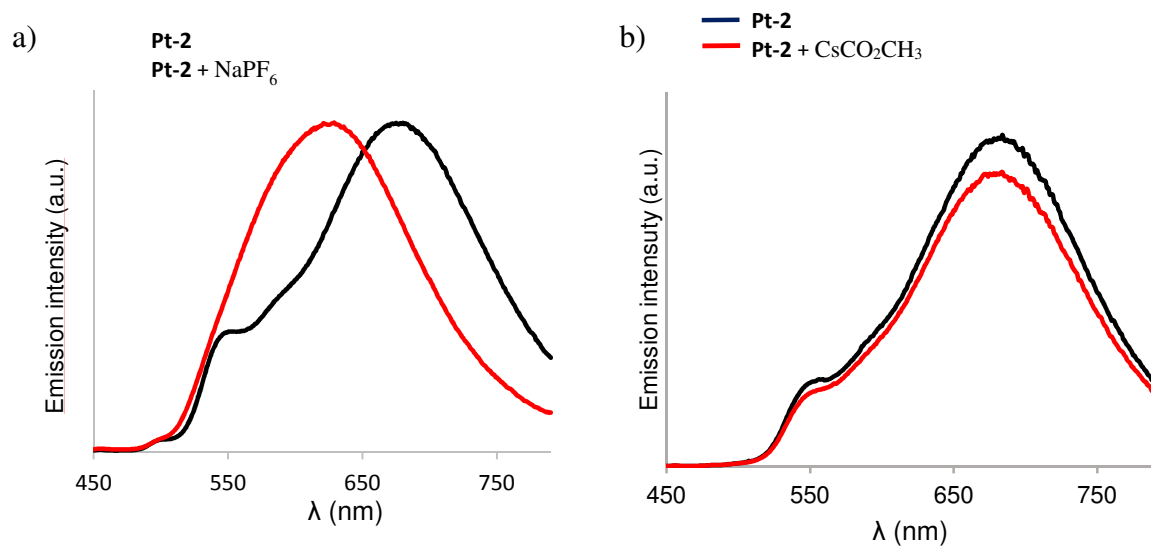

**Figure S16.** Emission spectra of **Pt-2** in  $\text{CH}_2\text{Cl}_2$  ( $\approx 10^{-4}$  M), before (black line) and after addition of a) 5 equiv. of  $\text{NaPF}_6$ , b) 6 equiv. of  $\text{CsCO}_2\text{CH}_3$  (red line).

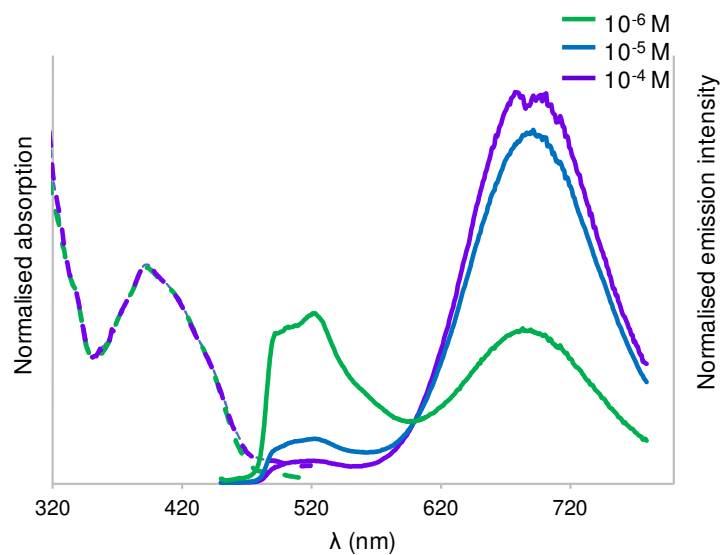

**Figure S17.** Absorption (dashed lines) and emission (plain lines) spectra of **Pt-3** in  $\text{CH}_2\text{Cl}_2$  at different concentrations.

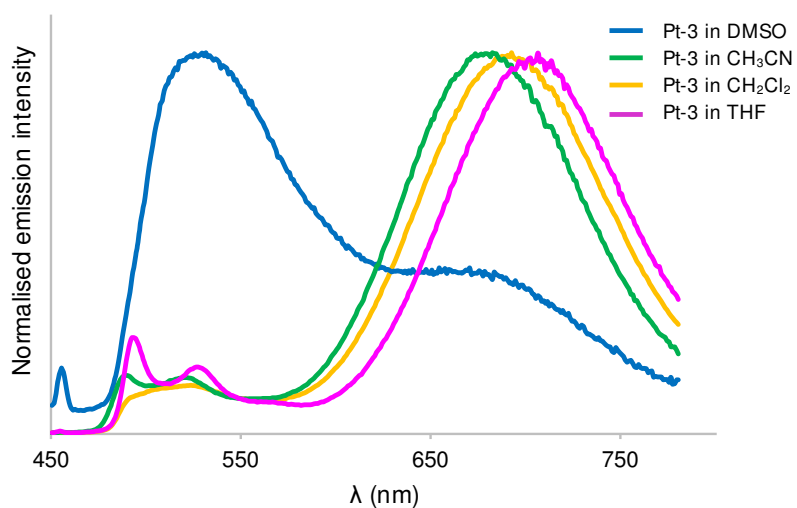

**Figure S18.** Emission spectra of **Pt-3** in different solvents ( $10^{-5}\text{M}$ ,  $\lambda_{\text{exc}} = 400 \text{ nm}$ ).

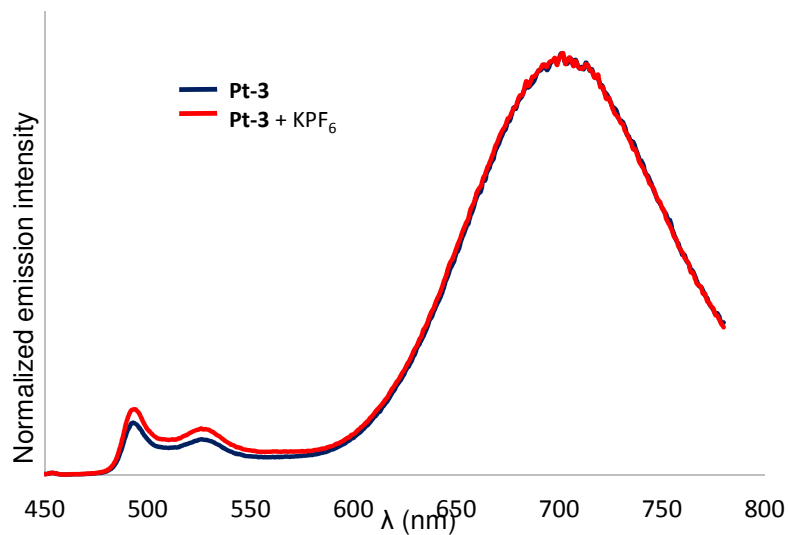

**Figure S19.** Emission spectra of **Pt-3** in THF (black line) and after addition of  $\text{KPF}_6$  (6 equiv. (red line)).

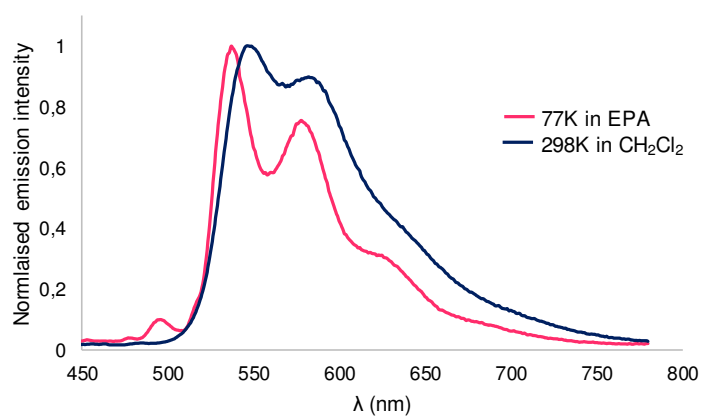

**Figure S20.** Emission spectra of **Pt-1** at 298K in  $\text{CH}_2\text{Cl}_2$  (blue line) and at 77K (red line) in EPA (ethanol/isopentane/diethylether : 2/2/1) glass,  $\lambda_{\text{exc}} = 400 \text{ nm.s}$

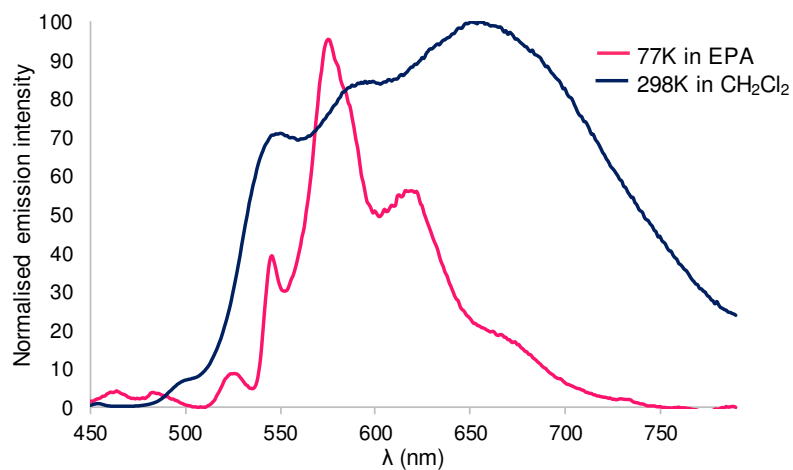

**Figure S21.** Emission spectra of **Pt-2** in  $\text{CH}_2\text{Cl}_2$  at room temperature ( $10^{-5}$  M,  $\lambda_{\text{exc}} = 400$  nm) and in EPA at 77K.

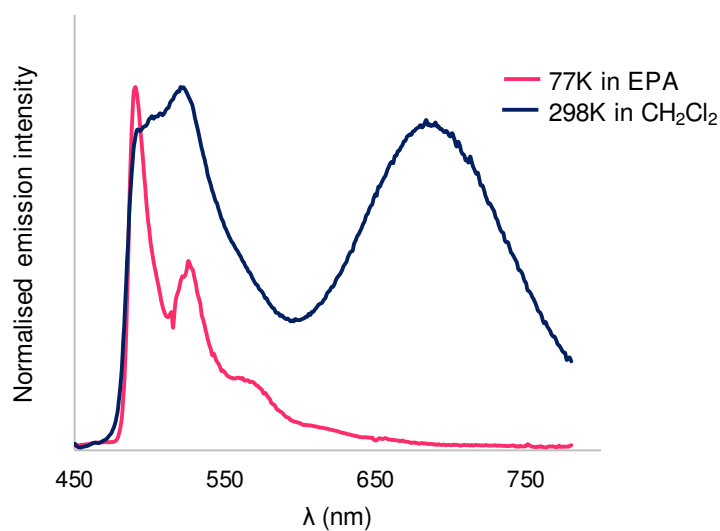

**Figure S22.** Emission spectra of **Pt-3** in  $\text{CH}_2\text{Cl}_2$  at room temperature ( $10^{-5}$  M,  $\lambda_{\text{exc}} = 400$  nm) and in EPA at 77K.

**Table S2.** Emission maxima in EPA (ethanol/isopentane/diethylether : 2/2/1) glass at 77 K,  $\lambda_{\text{exc}} = 400$  nm.

| Complex     | $\lambda_{\text{em}}/\text{nm}$ |
|-------------|---------------------------------|
| <b>Pt-1</b> | 538, 576, 628                   |
| <b>Pt-2</b> | 546, 577, 620                   |
| <b>Pt-3</b> | 491, 527, 570                   |

## Additional theoretical results

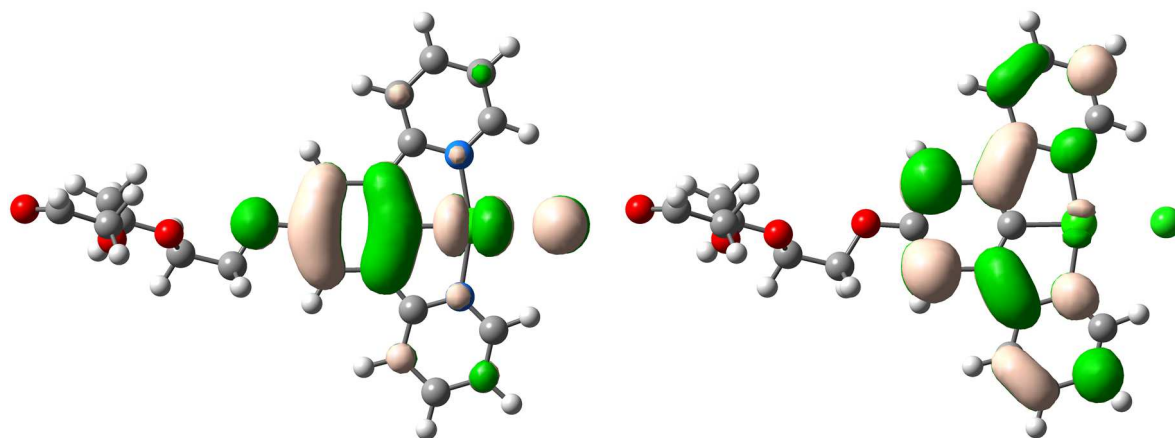

**Figure S23.** Representation of the HOMO (left) and LUMO (right) of **Pt-1**

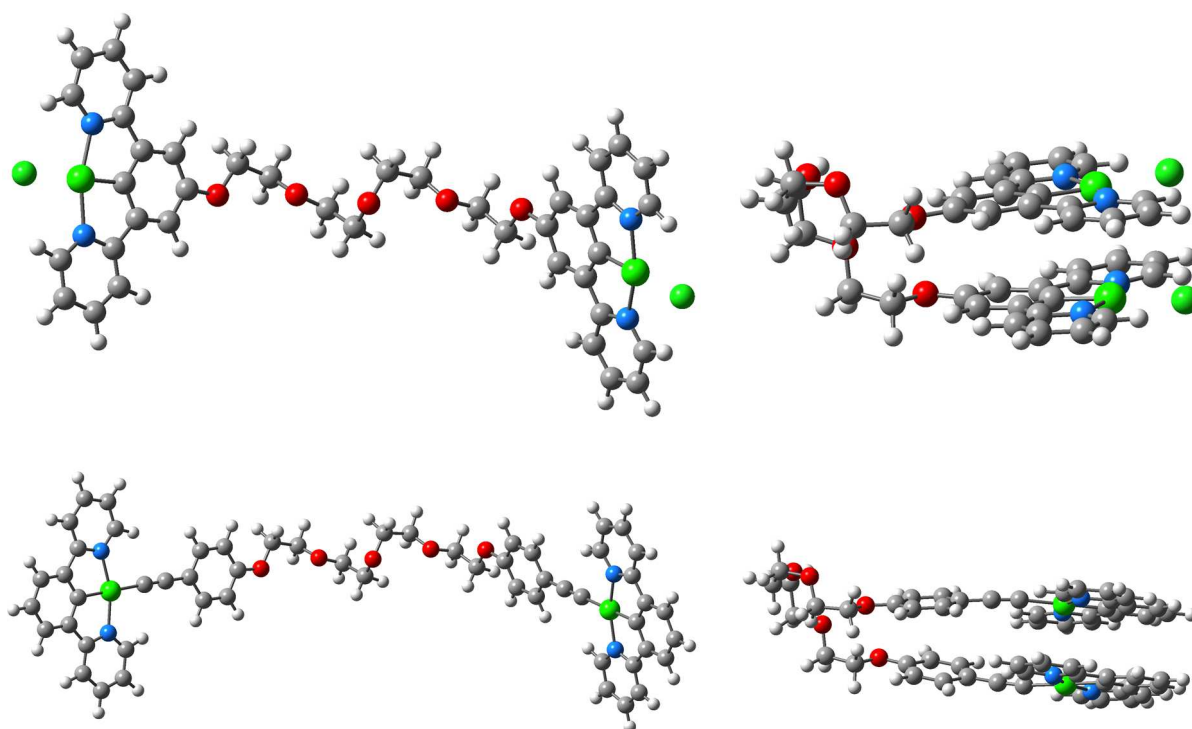

**Figure S24.** Representation of the DFT-optimized **Pt-2a** (top left), **Pt-2b** (top right), **Pt-3a** (bottom left), **Pt-3b** (bottom right).

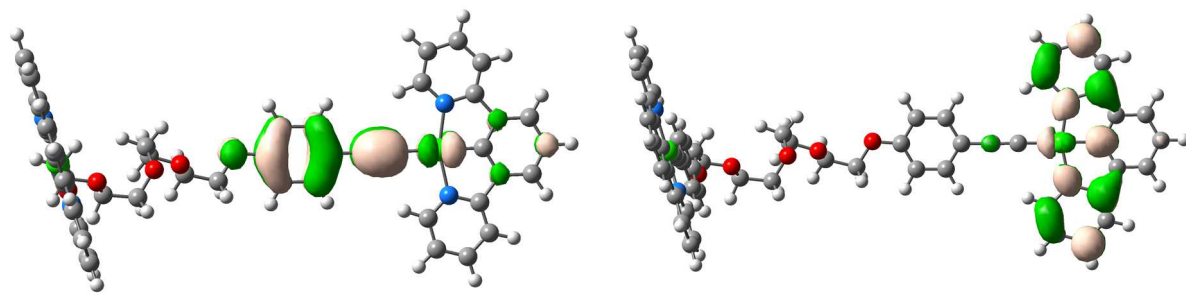

**Figure S25.** Representation of the HOMO (left) and LUMO (right) of **Pt-3**. Note that nearly degenerated MOs can be found on the second Pt complexes.

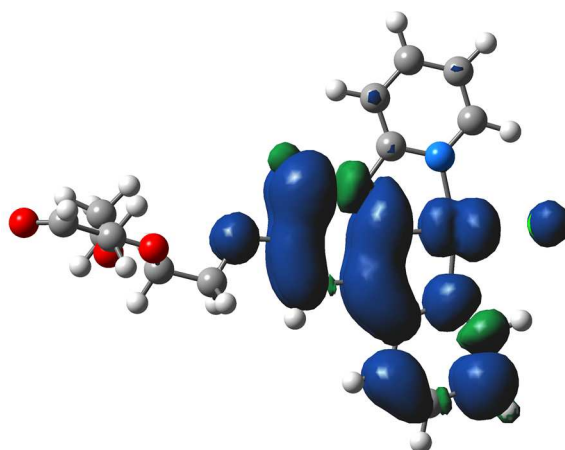

**Figure S26.** Representation of the spin density difference for the lowest triplet state of **Pt-1**



**Table S3.** TD-DFT results: transition wavelength (nm), oscillator strength and dominating MO composition (orbitals and relative weights). Only singlet excited-states showing significant oscillator strengths are described.

| Complex      | $\lambda$ /nm | $f$   | MO                                                            |
|--------------|---------------|-------|---------------------------------------------------------------|
| <b>Pt-1</b>  | 420.6         | 0.156 | H-L (0.68), H-L+1 (-0.14)                                     |
|              | 418.3         | 0.013 | H-L+1 (0.69), H-L (0.14)                                      |
| <b>Pt-2a</b> | 420.7         | 0.041 | H-L+1 (0.59), H-1-L+1 (0.32), H-L+3 (-0.14)                   |
|              | 420.5         | 0.253 | H-1-L (0.59), H-L+1 (-0.32), H-1-L+2 (-0.15)                  |
|              | 418.1         | 0.015 | H-L+3 (0.67), H-L+1 (0.17)                                    |
|              | 418.1         | 0.025 | H-1-L (0.67), H-1-L (0.16)                                    |
| <b>Pt-2b</b> | 448.4         | 0.039 | H-L (0.67), H-L+1 (-0.20)                                     |
|              | 435.5         | 0.087 | H-L+1 (0.63), H-L (0.20), H-L+2 (0.15), H-1-L (0.12)          |
|              | 431.2         | 0.032 | H-L+2 (0.62), H-1-L (0.24), H-L+1 (-0.17), H-1-L+1 (0.11)     |
|              | 419.7         | 0.011 | H-1-L (0.48), H-L+3 (0.34), H-1-L+1 (-0.27), H-L+2 (-0.21)    |
|              | 413.4         | 0.019 | H-2-L (0.56), H-L+2 (-0.26), H-2-L+1 (-0.22), H-1-L+2 (-0.15) |
|              | 412.2         | 0.010 | H-1-L (0.41), H-1-L+1 (0.34), H-L+3 (-0.32), H-1-L (-0.23)    |
|              | 401.7         | 0.016 | H-2-L+1 (0.61), H-2-L (0.26), H-2-L+2 (-0.16)                 |
|              | 401.5         | 0.013 | H-1-L+1 (0.52), H-L+3 (0.42), H-2-L (0.12), H-L+2 (-0.11)     |
|              | 394.9         | 0.070 | H-1-L+2 (0.65), H-L+3 (-0.15), H-2-L (0.14)                   |
|              | 389.2         | 0.001 | H-2-L+3 (0.48), H-2-L+2 (-0.47), H-2-L+1 (-0.14)              |
|              | 385.0         | 0.002 | H-2-L+3 (0.47), H-2-L+2 (0.46), H-2-L+1 (0.15)                |
|              | 383.4         | 0.008 | H-1-L+3 (0.68), H-L+1 (0.13)                                  |
| <b>Pt-3a</b> | 454.8         | 0.200 | H-L (0.60), H-1-L+1 (-0.35)                                   |
|              | 454.4         | 0.151 | H-1-L+1 (0.60), H-L (0.35)                                    |
|              | 436.1         | 0.058 | H-L+2 (0.69), H-4-L+2 (0.11)                                  |
|              | 435.9         | 0.077 | H-1-L+3 (0.69), H-5-L+3 (0.10)                                |
| <b>Pt-3b</b> | 484.0         | 0.003 | H-L (0.66), H-1-L+1 (-0.21)                                   |
|              | 462.1         | 0.043 | H-L+1 (0.66), H-L (0.20)                                      |
|              | 456.3         | 0.203 | H-1-L (0.52), H-L+2 (0.38), H-L+3 (0.22), H-1-L+1 (-0.12)     |
|              | 444.1         | 0.001 | H-L+3 (0.56), H-1-L+1 (-0.31), H-1-L (-0.22), H-1-L+1 (-0.12) |
|              | 441.3         | 0.001 | H-L+2 (0.43), H-1-L+1 (0.41), H-1-L (-0.30), H-L+3 (0.21)     |
|              | 428.4         | 0.000 | H-1-L+1 (0.44), H-L+2 (-0.38), H-L+3 (0.27), H-1-L (0.26)     |
|              | 421.2         | 0.008 | H-1-L+3 (0.51), H-1-L+2 (0.44), H-2-L (-0.13)                 |
|              | 410.4         | 0.037 | H-1-L+2 (0.52), H-1-L+3 (-0.45)                               |
|              | 403.2         | 0.055 | H-2-L (0.62), H-4-L (0.18), H-3-L (0.18), H-1-L+3 (0.12)      |
|              | 386.4         | 0.018 | H-2-L+1 (0.62), H-4-L+1 (0.20), H-3-L+1 (0.19), H-2-L (0.13)  |

**References:**

- [1] G. M. Sheldrick, *Acta Cryst. A71*, **2015**, 3–8.
- [2] G. M. Sheldrick, *Acta Cryst. C71*, **2015**, 3–8.
